# Supplementary material for: TiO2-modified CeVO4 catalyst for the selective catalytic reduction of NOx with NH3
Source: Royal Society of Chemistry journal article supplement (doi:10.1039/d2cy00848c), 2022-01-01
Supplement: d2cy00848c1.pdf [file d2cy00848c1.pdf]

## Supporting Information

### **TiO<sub>2</sub>-modified CeVO<sub>4</sub> catalyst for the selective catalytic reduction of NO<sub>x</sub> with NH<sub>3</sub>**

Yingjie Li <sup>a,b,c</sup>, Zihua Lian <sup>a\*</sup>, Jinhan Lin <sup>a,b</sup>, Meng Wang <sup>a,b</sup>, Wenpo Shan <sup>a,b\*</sup>

<sup>a</sup> Center for Excellence in Regional Atmospheric Environment and Key Laboratory of Urban Pollutant Conversion, Institute of Urban Environment, Chinese Academy of Sciences, Xiamen 361021, China;

<sup>b</sup> Zhejiang Key Laboratory of Urban Environmental Processes and Pollution Control, Ningbo Urban Environment Observation and Research Station, Institute of Urban Environment, Chinese Academy of Sciences, Ningbo 315800, China;

<sup>c</sup> University of Chinese Academy of Sciences, Beijing 100049, China

**Table S1** Physical properties of the catalysts.

| Sample               | S <sub>BET</sub> (m <sup>2</sup> /g) <sup>a</sup> | V <sub>p</sub> (cm <sup>3</sup> /g) <sup>b</sup> | D <sub>p</sub> (nm) <sup>c</sup> | Crystallite size (nm) <sup>d</sup> |
|----------------------|---------------------------------------------------|--------------------------------------------------|----------------------------------|------------------------------------|
| CeVO <sub>4</sub>    | 20.3                                              | 0.14                                             | 28.4                             | 25.0                               |
| CeVTi <sub>2.5</sub> | 33.6                                              | 0.12                                             | 14.4                             | 16.8                               |
| CeVTi <sub>5</sub>   | 50.6                                              | 0.14                                             | 10.2                             | 4.9                                |
| CeVTi <sub>10</sub>  | 88.9                                              | 0.23                                             | 8.6                              | 6.3                                |
| CeVTi <sub>20</sub>  | 105.3                                             | 0.27                                             | 8.7                              | 6.5                                |
| TiO <sub>2</sub>     | 106.8                                             | 0.19                                             | 5.0                              | 9.1                                |

<sup>a</sup> BET surface area

<sup>b</sup> BJH desorption pore volume

<sup>c</sup> BJH adsorption pore size

<sup>d</sup> Scherrer equation from XRD data

**Table S2** The results of H<sub>2</sub> consumption.

| Sample                        | H <sub>2</sub> consumption ( $\mu\text{mol/g}$ ) <sup>a</sup> |              |       |
|-------------------------------|---------------------------------------------------------------|--------------|-------|
|                               | Below 600 °C                                                  | Above 600 °C | Total |
| CeVO <sub>4</sub>             | 102                                                           | 3763         | 3866  |
| CeVTi <sub>2.5</sub>          | 2375                                                          | 1206         | 3581  |
| CeVTi <sub>5</sub>            | 2463                                                          | 186          | 2620  |
| CeVTi <sub>10</sub>           | 1835                                                          | 160          | 1995  |
| CeVTi <sub>20</sub>           | 1079                                                          | 79           | 1158  |
| TiO <sub>2</sub>              | 28                                                            | -            | 28    |
| V <sub>2</sub> O <sub>5</sub> | -                                                             | 11878        | 11878 |
| CeO <sub>2</sub>              | 1008                                                          | 937          | 1945  |

<sup>a</sup> quantified by the H<sub>2</sub>-TPR

**Table S3** The surface atomic concentration of CeVTi<sub>x</sub> catalysts obtained from XPS.

| Sample               | Surface atomic concentration (%) |       |       |       |                          |
|----------------------|----------------------------------|-------|-------|-------|--------------------------|
|                      | Ce                               | V     | Ti    | O     | Surface V/Ce molar ratio |
| CeVO <sub>4</sub>    | 15.08                            | 15.25 | -     | 69.67 | 1.01                     |
| CeVTi <sub>2.5</sub> | 5.82                             | 7.80  | 18.06 | 68.32 | 1.34                     |
| CeVTi <sub>5</sub>   | 4.01                             | 5.57  | 22.43 | 67.99 | 1.39                     |
| CeVTi <sub>10</sub>  | 2.50                             | 4.22  | 26.81 | 66.47 | 1.69                     |
| CeVTi <sub>20</sub>  | 1.44                             | 2.77  | 29.47 | 66.32 | 1.92                     |
| TiO <sub>2</sub>     | -                                | -     | 25.70 | 74.30 | -                        |

**Table S4** The XPS results on Ce-V-Ti catalysts.

| Sample               | $O_{\alpha}/(O_{\alpha} + O_{\beta} + O_{\gamma})$ (%) | $Ce^{4+}/(Ce^{3+} + Ce^{4+})$ (%) | $V^{4+}/(V^{4+} + V^{5+})$ (%) |
|----------------------|--------------------------------------------------------|-----------------------------------|--------------------------------|
| CeVO <sub>4</sub>    | 9.4                                                    | 35.2                              | 4.6                            |
| CeVTi <sub>2.5</sub> | 15.3                                                   | 53.9                              | 22.6                           |
| CeVTi <sub>5</sub>   | 19.5                                                   | 54.9                              | 26.0                           |
| CeVTi <sub>10</sub>  | 15.9                                                   | 46.1                              | 20.5                           |
| CeVTi <sub>20</sub>  | 15.0                                                   | 43.9                              | 16.7                           |
| TiO <sub>2</sub>     | 12.5                                                   | -                                 | -                              |

**Table S5** Amounts of NH<sub>3</sub> adsorption over Ce-V-Ti catalysts.

| Samples              | NH <sub>3</sub> adsorption (μmol/g) |
|----------------------|-------------------------------------|
| CeVO <sub>4</sub>    | 41.3                                |
| CeVTi <sub>2.5</sub> | 68.1                                |
| CeVTi <sub>5</sub>   | 124.5                               |
| CeVTi <sub>10</sub>  | 221.9                               |
| CeVTi <sub>10</sub>  | 252.2                               |
| TiO <sub>2</sub>     | 313.4                               |

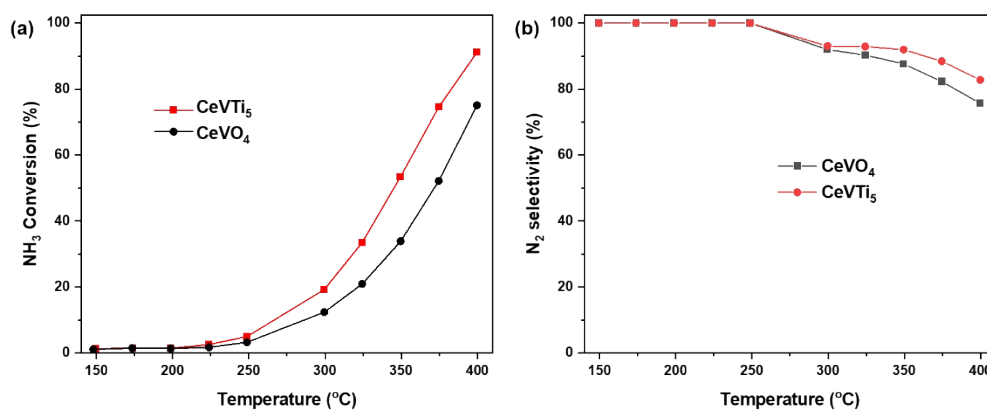

**Fig. S1** NH<sub>3</sub> conversion in NH<sub>3</sub> oxidation reactions over CeVO<sub>4</sub> and CeVTi<sub>5</sub> catalysts. NH<sub>3</sub> oxidation efficiency (a), selectivity for N<sub>2</sub> (b). Reaction conditions: 500 ppm NH<sub>3</sub>, 5% O<sub>2</sub> and N<sub>2</sub> balance, under a GHSV of 200,000 h<sup>-1</sup>.

In the oxidation of NH<sub>3</sub> reaction, the NH<sub>3</sub> conversion and the selectivity for the formation of N<sub>2</sub> were defined by the following equations:

$$\text{NH}_3 \text{ conversion} = \left( \frac{[\text{NH}_3]_{\text{in}} - [\text{NH}_3]_{\text{out}}}{[\text{NH}_3]_{\text{in}}} \right) \times 100\% \quad (1)$$

$$\text{N}_2 \text{ selectivity} = \left( 1 - \frac{[\text{NO}]_{\text{out}} + [\text{NO}_2]_{\text{out}} + 2[\text{N}_2\text{O}]_{\text{out}}}{[\text{NH}_3]_{\text{in}} - [\text{NH}_3]_{\text{out}}} \right) \times 100\% \quad (2)$$

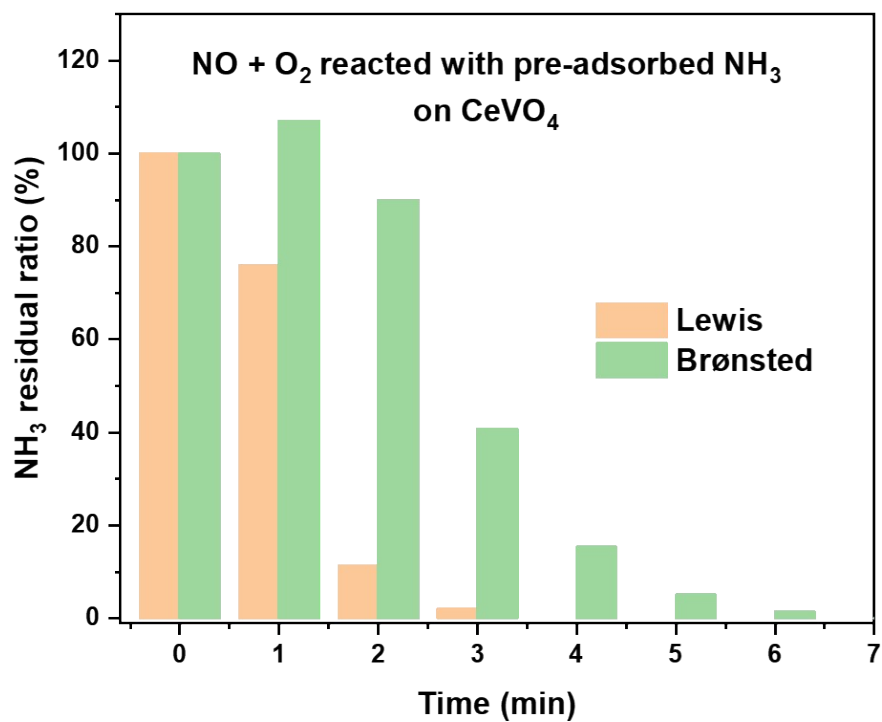

**Fig. S2** The NH<sub>3</sub> residual ratio by calculating integral area at Lewis acid site (1187 cm<sup>-1</sup>) and Brønsted acid site (1423 cm<sup>-1</sup>) with the reaction time under the reaction between NO + O<sub>2</sub> and pre-adsorbed NH<sub>3</sub> on CeVO<sub>4</sub> catalyst.



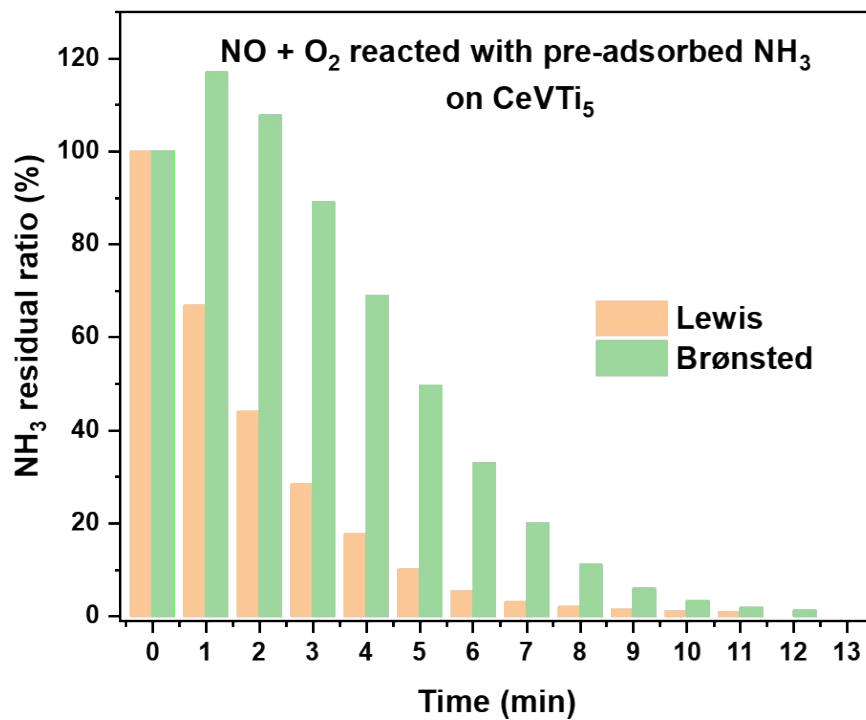

**Fig. S3** The NH<sub>3</sub> residual ratio by calculating integral area at Lewis acid site (1228 cm<sup>-1</sup>) and Brønsted acid site (1423 cm<sup>-1</sup>) with the reaction time under the reaction between NO + O<sub>2</sub> and pre-adsorbed NH<sub>3</sub> on CeVTi<sub>5</sub> catalyst.
